# Supplementary material
Source: Research Square preprint supplement (doi:10.21203/rs.3.rs-9176845/v1)
Supplement: Supplementary file 1 [file 02d31daaf95d32596508672a.docx]

**Additional file 1: Supplementary Tables S1–S6**

Table S1: Baseline correlation of BChE with albumin and GNRI

Table S2: Fully adjusted model for concurrent 3-month changes in ΔlogDW (rolling 3-month windows)

Table S3: Sensitivity model replacing ΔlogAlb with ΔGNRI (albumin excluded) for concurrent 3-month changes in ΔlogDW (rolling 3-month windows)

Table S4: Sensitivity analyses including dialysis modality and cardiothoracic ratio (CTR)

Table S5: Sensitivity analyses accounting for within-patient dependence across overlapping 3-month rolling windows

Table S6: Correlation between concurrent 3-month changes in biomarkers across rolling windows

**Table S1.** Baseline correlation of BChE with albumin and GNRI

*Baseline values were defined as measurements at month 0. Spearman rank correlation coefficients are shown.*

| Variables | N (observations) | Spearman ρ | P value |
| --- | --- | --- | --- |
| BChE vs albumin | 96 | 0.298 | 0.0032 |
| BChE vs GNRI | 96 | 0.393 | <0.001 |
| BChE vs albumin (partial, adjusted for CRP)* | 96 | 0.311 | 0.002 |
| BChE vs GNRI (partial, adjusted for CRP)* | 96 | 0.402 | <0.001 |

**Partial correlation was approximated using rank-transformed residualization (partial Spearman).*

**Table S2.** Fully adjusted model for concurrent 3-month changes in ΔlogDW (rolling 3-month windows).

Patient-clustered robust standard errors were used. Unstandardized coefficients are from the model in original units; standardized coefficients are from z-score–standardized variables. ΔlogX denotes the difference in natural log-transformed values between the start and end of each 3-month window (log[X_end/X_start]).

| **Predictor** | **Unstandardized β** | **Standardized β** | **P value** |
| --- | --- | --- | --- |
| ΔlogBChE | 0.018 | 0.096 | 0.026 |
| ΔlogAlb | -0.003 | -0.011 | 0.82 |
| ΔloghANP | 0.004 | 0.132 | 0.002 |
| ΔlogCRP | 0.000 | 0.005 | 0.87 |
| Sex | 0.000 | 0.012 | 0.82 |
| Age, years | -0.000 | -0.004 | 0.95 |
| Diabetes mellitus | -0.003 | -0.181 | <0.001 |
| Dialysis modality  (HDF vs HD) | 0.002 | 0.121 | 0.054 |
| Dialysis vintage, months | -0.000 | -0.066 | 0.19 |
| Delivered Kt/V (baseline) | 0.009 | 0.204 | <0.001 |
| Cardiothoracic ratio (baseline) | -0.000 | -0.107 | 0.068 |

**Table S3.** Sensitivity model replacing ΔlogAlb with ΔGNRI (albumin excluded) for concurrent 3-month changes in ΔlogDW (rolling 3-month windows).

Patient-clustered robust standard errors were used. ΔlogX denotes log[X_end/X_start] within each 3-month window.

| **Predictor** | **Unstandardized β** | **Standardized β** | **P value** |
| --- | --- | --- | --- |
| ΔlogBChE | 0.015 | 0.082 | 0.049 |
| ΔloghANP | 0.004 | 0.131 | 0.002 |
| ΔlogCRP | 0.000 | 0.012 | 0.65 |
| ΔGNRI | 0.000 | 0.025 | 0.66 |
| Sex | 0.000 | 0.012 | 0.82 |
| Age, years | -0.000 | -0.004 | 0.95 |
| Diabetes mellitus | -0.003 | -0.181 | <0.001 |
| Dialysis modality  (HDF vs HD) | 0.003 | 0.122 | 0.052 |
| Dialysis vintage, months | -0.000 | -0.067 | 0.18 |
| Delivered Kt/V (baseline) | 0.009 | 0.205 | <0.001 |
| Cardiothoracic ratio (baseline) | -0.000 | -0.107 | 0.067 |

**Table S4.** Sensitivity analyses including dialysis modality and cardiothoracic ratio (CTR).

Patient-clustered robust standard errors were used. Models were fit on overlapping 3-month rolling windows.

β coefficients are unstandardized and correspond to changes in ΔlogDW per unit change in each predictor. ΔlogX denotes log[X_end/X_start] within each 3-month window.

| Model | ΔlogBChE β (95% CI) | ΔlogBChE  P value | CTR β  (P value) | HDF β  (P value) | N (observations) |
| --- | --- | --- | --- | --- | --- |
| Fully adjusted (without CTR) | 0.046 (0.010 – 0.083) | 0.013 | — | 0.006  (P = 0.041) | 1247 |
| Fully adjusted + CTR | 0.041 (0.005 – 0.077) | 0.026 | -0.000453  (P = 0.068) | 0.006  (P = 0.054) | 1231 |

Same covariates as Supplementary Table 2, with/without adding CTR.

**Table S5.** Sensitivity analyses accounting for within-patient dependence across overlapping 3-month rolling windows.

Outcome and predictors were standardized (z-scores) across all windows; coefficients therefore represent standardized β. ΔlogX denotes log[X_end/X_start] within each 3-month window before standardization.

| Predictor | OLS (patient-clustered SE) | Linear mixed-effects (random intercept) | GEE (exchangeable working correlation) |
| --- | --- | --- | --- |
| ΔlogBChE | 0.115 (0.041), p=0.005 | 0.052 (0.031), p=0.096 | 0.052 (0.043),  p=0.23 |
| ΔlogAlb | -0.036 (0.042), p=0.39 | -0.012 (0.029), p=0.67 | -0.012 (0.039), p=0.75 |
| ΔloghANP | 0.144 (0.045), p=0.001 | 0.144 (0.026), p<0.001 | 0.144 (0.036), p<0.001 |

Abbreviations: BChE, butyrylcholinesterase; hANP, human atrial natriuretic peptide; SE, standard error; LMM, linear mixed-effects model; RI, random intercept; GEE, generalized estimating equations.

**Table S6.** Correlation between concurrent 3-month changes in biomarkers across rolling windows

| Variables | N (windows) | Spearman ρ | 95% CI (cluster bootstrap) | P value |
| --- | --- | --- | --- | --- |
| ΔlogBChE vs ΔloghANP | 1248 | -0.315 | -0.371 to -0.260 | <0.001 |

Δlog indicates the difference in natural log-transformed values between the start and end of each 3-month window (log-ratio). The 95% confidence interval was obtained using patient-level cluster bootstrap resampling (2,000 replicates).
