# Supplementary material
Source: Research Square preprint supplement (doi:10.21203/rs.3.rs-9176845/v1)
Supplement: Supplementary file 2 [file 603c48b493728e198555d8de.docx]

**Additional file 2: Supplementary Figure S1**

**Figure S1.** Individual longitudinal trajectories of biochemical markers and dry weight.


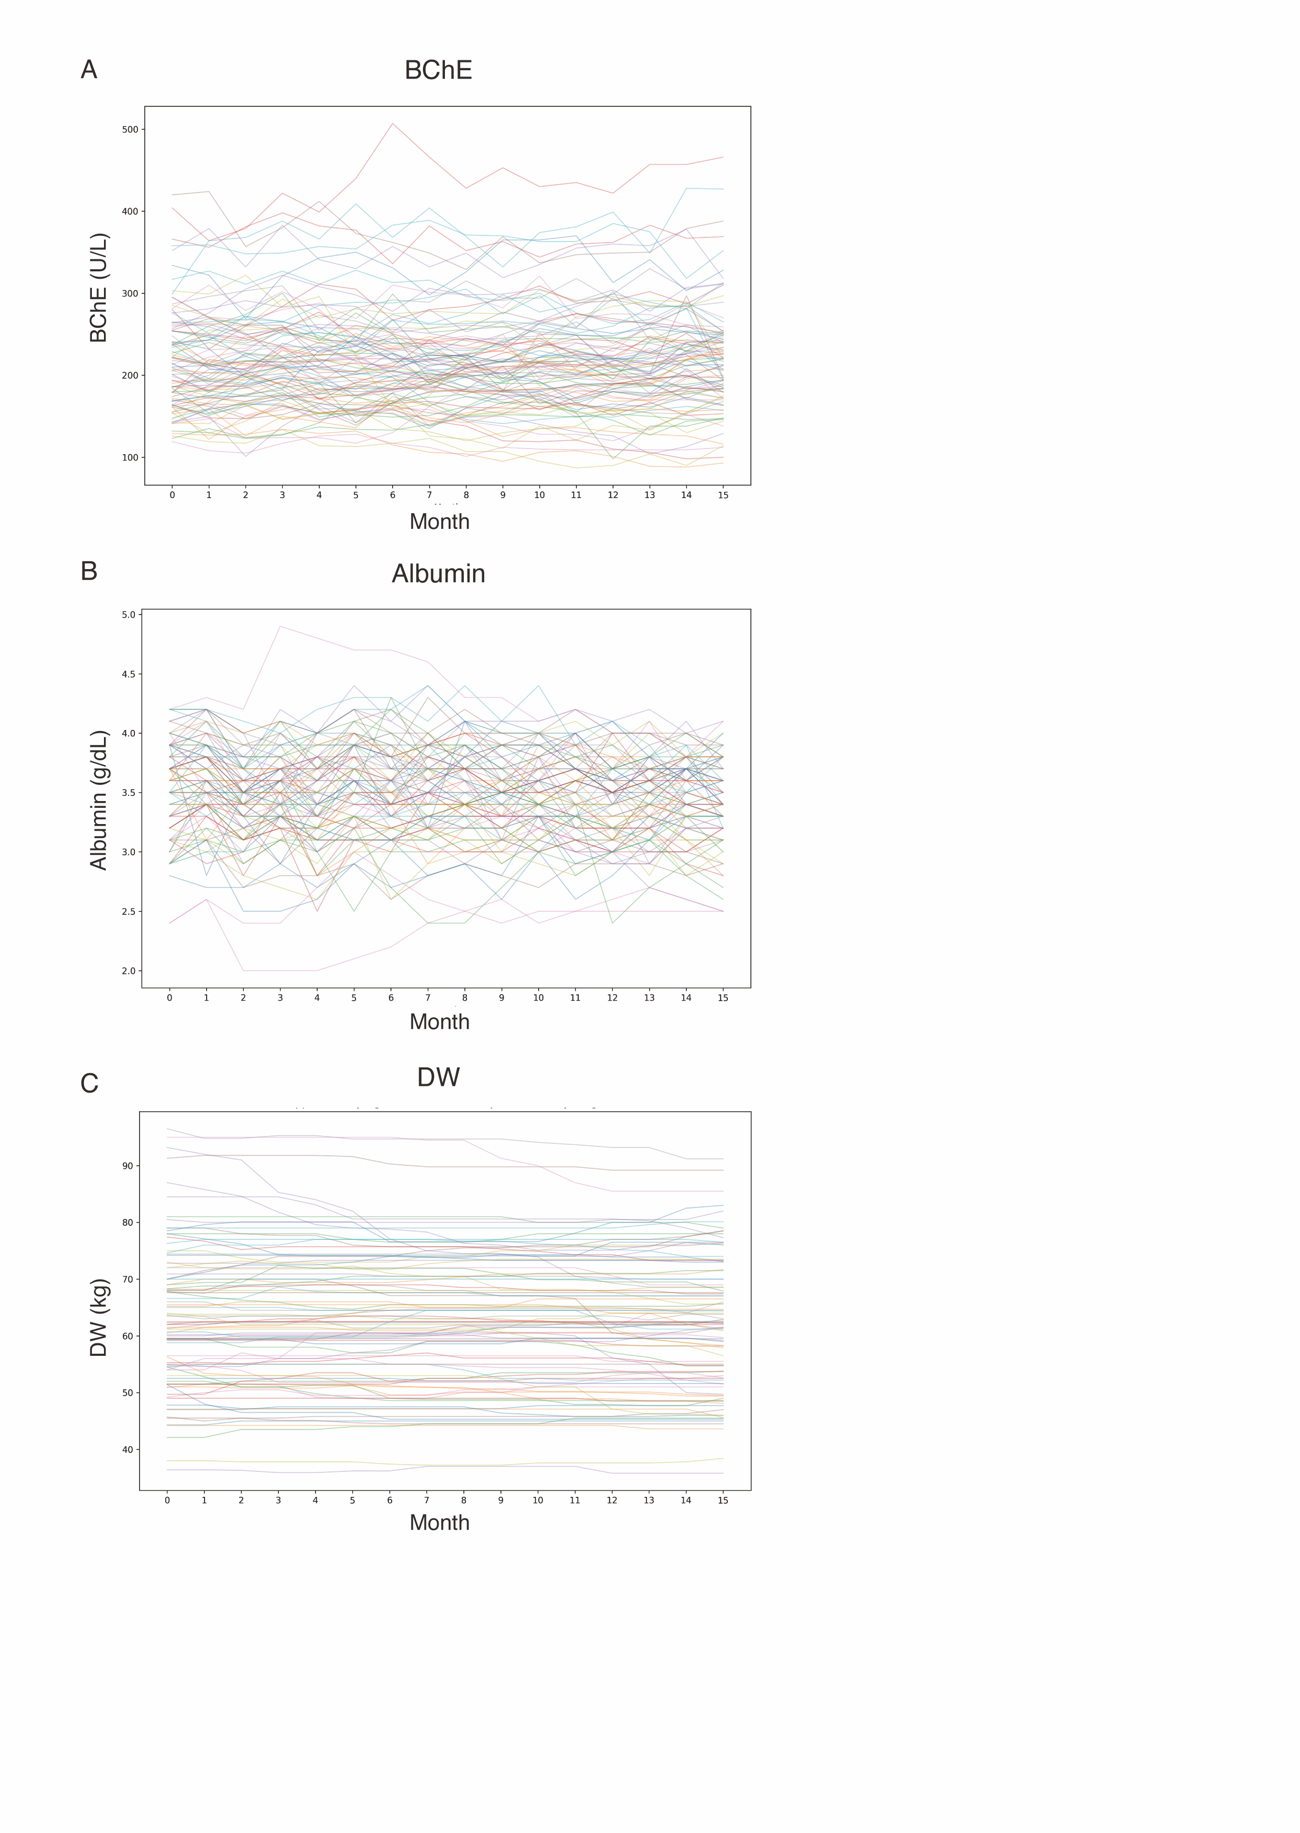


Representative individual trajectories of (A) serum BChE, (B) serum albumin, and (C) DW over time are shown for a randomly selected subset of patients. BChE demonstrates relatively smooth within-patient changes, whereas albumin shows greater short-term variability. DW changes occur in a stepwise manner reflecting clinical adjustment.
